# Supplementary material for: Conformation of poly(ethylene oxide) dissolved in the solvate ionic liquid [Li(G4)]TFSI
Source: Royal Society of Chemistry journal article supplement (doi:10.1039/c5cp02033f), 2015-01-01
Supplement: c5cp02033f1.pdf [file c5cp02033f1.pdf]

Supporting information

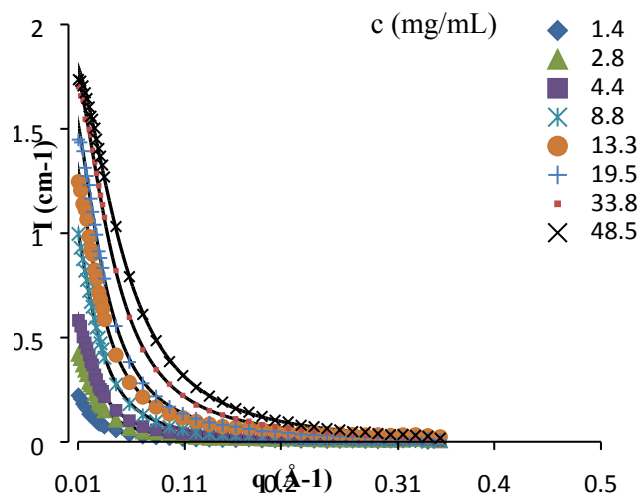

**Figure S1.** SANS patterns for d-PEO-[Li(G4)]TFSI solutions with background subtracted.

Lines are Ornstein-Zernike formula fits to the data.
